# Supplementary material
Source: PubMed Central journal article supplement (PMC7166164)
Supplement: NIHMS1542319-supplement-1.pdf [file NIHMS1542319-supplement-1.pdf]

## SUPPLEMENTAL MATERIALS

### Methods

#### Genotyping

Genomic DNA was extracted from either peripheral blood mononuclear cells or from normal tissue obtained from pancreatic resection specimens (duodenum, spleen, or pancreas) as previously described<sup>1</sup>. Sixteen SNPs (in *FUT3*, *FUT2*, *FUT6*, *ABO*, *GAL3ST2*, *MUC16*, *B3GNT3*, *FAM3B* and *THBS2*) known to be associated with tumor marker levels from prior studies<sup>2-5, 6, 7, 8</sup> were genotyped (Table S1). The *FUT3* and *FUT2* SNPs used in this study encode for an inactivate protein and the relevant ABO SNP encodes for blood group B. Fourteen SNPs were sequenced using an AmpliSeq Custom Panel (Table S1). Next-generation sequencing (NGS) was performed with 520 chips (Ion S5 system) according to the manufacturer's protocols and as previously described<sup>9, 10</sup>. Genotyping of rs81293 (T202C) in *FUT3* and rs12469459 in *GAL3ST2* was performed with a Taqman<sup>TM</sup> SNP Genotyping Assay (Applied Biosystems, USA).

#### ELISA

All assays were performed according to manufacturer's protocols. Absorbance was measured using an xMark<sup>TM</sup> Microplate Absorbance Spectrophotometer (Bio-Rad Laboratories, Inc. USA). Marker levels were determined from standard curves of the protein standards provided for each ELISA generated from a four-parameter logistic nonlinear regression model using JMP 13 software (SAS Institute, Cary, NC, USA). Thrombospondin-2 was not measured in some Stage I PDAC cases-they were held back from analysis to preserve these samples. Two

different lots of CEA ELISAs were used; the coefficient of variation for lot 1 was 8.9% and for lot 2 was 5.1%. There was a lot-to-lot difference in the mean CEA level in reference serum samples so CEA levels from the 2<sup>nd</sup> lot were normalized to those of the first lot determined by the mean levels in the reference serum samples in both lots.

### Supplemental Results

CA19-9 levels did not differ significantly between *FUT2*-heterozygous and *FUT2*-wild-type subjects. Among *FUT3*-null subjects, CA19-9 levels were not significantly different by *FUT2* status. Among *FUT2*-null subjects CA19-9 levels were not significantly different among *FUT3*-wild-type compared to *FUT3*-heterozygotes.

The overall mean/SD level of CA19-9 in all control patients unclassified with respect to tumor marker genotype in the discovery set was 11.7/11.5 U/ml. We did not find other variants (*FUT6*, *B3GNT3*)<sup>6</sup> were associated with CA19-9 levels once *FUT3* variant status was accounted for (data not shown).

Among PDAC patients, CA19-9 levels were significantly different within genotype subgroups ( $p < 0.00001$ , Mann-Whitney, *FUT2*-null versus other groups and *FUT3*-null versus other groups).

We calculated the number needed to diagnose and the number needed to misdiagnose (NNM)<sup>11</sup>. NNM is an index of diagnostic effectiveness. For CA19-9, the NNM calculated for a PDAC prevalence of 1% is 68, 72 and 75, respectively using the uniform, genotype-stratified, and intact *FUT3* genotype-stratified cut-offs. The number needed to diagnose a PDAC using

genotype-stratified CA19-9 alone at a prevalence of 0.5% would be 330; at 1% it would be 164. To detect a Stage I PDAC at a 1% prevalence, it would be 250. Assuming 50% cure rate for patients under regular surveillance diagnosed with PDAC, (based on our CAPS experience<sup>12</sup> and a conservative estimate based on our recent analysis of SEER data in submission), the number needed to test to prevent 1 death would be 500.

In the discovery control set, significant differences in mean CEA levels were observed between the largest group, FUT2+/non-B, vs. each of the other four groups (P=0.0003, 0.0083, 0.0378 and <0.0001, respectively). In the validation set, significant differences in mean CEA levels were again observed between the FUT2+/non-B, and the FUT2-null/B and FUT2+/B groups (each p=0.04)

We tested one candidate *THBS2* variant (rs8089) for its association with serum thrombospondin-2 levels<sup>13</sup>, but we did not find evidence for an association (data not shown). The diagnostic sensitivity of genotype-stratified CEA for PDAC was 15% among non-smokers. The diagnostic sensitivity of a uniform cut-off for CA125 for PDAC was 12.8% among non-smokers.

### Supplemental References cited

1. Shindo K, Yu J, Suenaga M, et al. Deleterious Germline Mutations in Patients With Apparently Sporadic Pancreatic Adenocarcinoma. *Journal of clinical oncology : official journal of the American Society of Clinical Oncology*. 2017;35(30):3382-90. Epub 2017/08/03.
2. Narimatsu H, Iwasaki H, Nakayama F, et al. Lewis and secretor gene dosages affect CA19-9 and DU-PAN-2 serum levels in normal individuals and colorectal cancer patients. *Cancer research*. 1998;58(3):512-8. Epub 1998/02/11.
3. Luo G, Guo M, Jin K, et al. Optimize CA19-9 in detecting pancreatic cancer by Lewis and Secretor genotyping. *Pancreatology : official journal of the International Association of Pancreatology (IAP)* [et al]. 2016;16(6):1057-62. Epub 2016/10/04.
4. Kawai S, Suzuki K, Nishio K, et al. Smoking and serum CA19-9 levels according to Lewis and secretor genotypes. *International journal of cancer Journal international du cancer*. 2008;123(12):2880-4. Epub 2008/09/23.

5. Park HD, Park KU, Song J, et al. The relationship between Lewis/Secretor genotypes and serum carbohydrate antigen 19-9 levels in a Korean population. *The Korean journal of laboratory medicine*. 2010;30(1):51-7. Epub 2010/03/04.
6. He M, Wu C, Xu J, et al. A genome wide association study of genetic loci that influence tumour biomarkers cancer antigen 19-9, carcinoembryonic antigen and alpha fetoprotein and their associations with cancer risk. *Gut*. 2014;63(1):143-51. Epub 2013/01/10.
7. Williams KA, Terry KL, Tworoger SS, et al. Polymorphisms of MUC16 (CA125) and MUC1 (CA15.3) in relation to ovarian cancer risk and survival. *PloS one*. 2014;9(2):e88334. Epub 2014/02/20.
8. Folkersen L, Fauman E, Sabater-Lleal M, et al. Mapping of 79 loci for 83 plasma protein biomarkers in cardiovascular disease. *PLoS genetics*. 2017;13(4):e1006706. Epub 2017/04/04.
9. Yu J, Sadakari Y, Shindo K, et al. Digital next-generation sequencing identifies low-abundance mutations in pancreatic juice samples collected from the duodenum of patients with pancreatic cancer and intraductal papillary mucinous neoplasms. *Gut*. 2017;66:1677-87.
10. Suenaga M, Yu J, Shindo K, et al. Pancreatic Juice Mutation Concentrations Can Help Predict the Grade of Dysplasia in Patients Undergoing Pancreatic Surveillance. *Clinical cancer research : an official journal of the American Association for Cancer Research*. 2018;24(12):2963-74. Epub 2018/01/06.
11. Habibzadeh F, Yadollahie M. Number needed to misdiagnose: a measure of diagnostic test effectiveness. *Epidemiology (Cambridge, Mass)*. 2013;24(1):170. Epub 2012/12/13.
12. Canto MI, Almario JA, Schulick RD, et al. Risk of Neoplastic Progression in Individuals at High Risk for Pancreatic Cancer Undergoing Long-term Surveillance. *Gastroenterology*. 2018;155(3):740-51.e2. Epub 2018/05/29.
13. Boekholdt SM, Trip MD, Peters RJ, et al. Thrombospondin-2 polymorphism is associated with a reduced risk of premature myocardial infarction. *Arteriosclerosis, thrombosis, and vascular biology*. 2002;22(12):e24-7. Epub 2002/12/17.

**Table S1. SNPs characterized in this study and the associated tumor markers affected**

| gene           | SNP db     | position       | variant        | location | function  | genotyping | tumor marker     | Chr   | Chr_Start | Chr_End   |
|----------------|------------|----------------|----------------|----------|-----------|------------|------------------|-------|-----------|-----------|
| <i>FUT2</i>    | rs601338   | Chr19:49206674 | G428A          | exon     | nonsense  | NGS        | CA19-9/CEA       | Chr19 | 49206582  | 49206721  |
| <i>FUT2</i>    | rs281377   | Chr19:49206603 | T357C          | exon     | missense  | NGS        | CA19-9/CEA       | Chr19 | 49206582  | 49206721  |
| <i>FUT2</i>    | rs1047781  | Chr19:49206631 | A385T          | exon     | missense  | NGS        | CA19-9/CEA       | Chr19 | 49206582  | 49206721  |
| <i>FUT3</i>    | rs28362459 | Chr19:5844792  | T59G           | exon     | missense  | NGS        | CA19-9           | Chr19 | 5844736   | 5844910   |
| <i>FUT3</i>    | rs812936   | Chr19:5844649  | T202C          | exon     | missense  | RT-PCR     | CA19-9           | Chr19 | 5844624   | 5844674   |
| <i>FUT3</i>    | rs778986   | Chr19:5844537  | C314T          | exon     | missense  | NGS        | CA19-9           | Chr19 | 5844482   | 5844648   |
| <i>FUT3</i>    | rs3745635  | Chr19:5844343  | G508A          | exon     | missense  | NGS        | CA19-9           | Chr19 | 5844282   | 5844455   |
| <i>FUT3</i>    | rs3894326  | Chr19:5843784  | T1067A         | exon     | missense  | NGS        | CA19-9           | Chr19 | 5843661   | 5843827   |
| <i>FUT6</i>    | rs17271883 | Chr19:5834212  | g.5834212C>T   | intron   | missense  | NGS        | CA19-9           | Chr19 | 5834183   | 5834331   |
| <i>FUT6</i>    | rs3760775  | Chr19:5841356  | g.5841356G>T   | upstream | missense  | NGS        | CA19-9/CEA       | Chr19 | 5841225   | 5841380   |
| <i>B3GNT3</i>  | rs265548   | Chr19:17902334 | g.17902334T>C  | upstream | missense  | NGS        | CA19-9           | Chr19 | 17902252  | 17902426  |
| <i>ABO</i>     | rs8176746  | Chr9:136131322 | c.796C>A       | exon     | missense  | NGS        | CEA              | Chr9  | 136131239 | 136131396 |
| <i>ABO</i>     | rs8176719  | Chr9:136132908 | c.260_262insG  | exon     | insertion | NGS        | CEA              | Chr9  | 136132777 | 136132946 |
| <i>FAM3B</i>   | rs441810   | Chr21:42698907 | g.42698907A>G  | intron   | missense  | NGS        | CEA              | Chr21 | 42698809  | 42698978  |
| <i>THBS2</i>   | rs8089     | Chr6:169617726 | g.169617726A>C | 3'UTR    | missense  | NGS        | thrombospondin-2 | Chr6  | 169617635 | 169617809 |
| <i>GAL3ST2</i> | rs12469459 | Chr2:242716380 | c.10A>T        | exon     | missense  | RT-PCR     | CA125            | Chr2  | 242716355 | 242716405 |

Abbreviations:RT-PCR, real-time PCR

**Table S2. SNP stratified tumor marker specificity in validation set controls**

| CA19-9                               | Discovery set cut off (Mean + 3SD) | number | false positives (n) | Specificity (95% CI)     |
|--------------------------------------|------------------------------------|--------|---------------------|--------------------------|
| FUT3 (-/-)                           | 9.5                                | 22     | 1                   |                          |
| FUT3 (+/-)                           | 23.5                               | 92     | 0                   |                          |
| FUT3 (+/+)                           | 38.1                               | 92     | 0                   |                          |
| FUT2 (-/-)                           | 66.6                               | 53     | 2                   |                          |
| All genotype stratified              |                                    |        |                     | 98.8% (96.65% to 99.76%) |
| Uniform cut-off (not SNP stratified) | 46.1                               | 259    | 4                   | 98.5% (96.09% to 99.58%) |

  

| CEA                                  | Discovery set cut off (Mean + 3SD) | number | false positives (n) | Specificity              |
|--------------------------------------|------------------------------------|--------|---------------------|--------------------------|
| FUT2+/blood B                        | 6.6                                | 22     | 0                   |                          |
| FUT2+/non-blood B                    | 2.8                                | 174    | 3                   |                          |
| FUT2 (-/-)/blood B                   | 4.3                                | 5      | 0                   |                          |
| FUT2 (-/-)/non blood B smoker        | 4.0                                | 47     | 0                   |                          |
|                                      | 4.2                                | 11     | 2                   |                          |
| All genotype stratified              |                                    |        |                     | 98.1% (95.55% to 99.37%) |
| Uniform cut-off (Not SNP stratified) | 3.9                                | 259    | 3                   | 98.8% (96.65% to 99.76%) |

  

| CA125                                | Discovery set cut off (Mean + 3SD) | number | false positives (n) | Specificity              |
|--------------------------------------|------------------------------------|--------|---------------------|--------------------------|
| GAL3ST2 Wild-type                    | 22.3                               | 81     | 1                   |                          |
| GAL3ST2 Heterozygous                 | 16.2                               | 85     | 1                   |                          |
| GAL3ST2 Homozygous                   | 10.7                               | 16     | 2                   |                          |
| All genotype stratified              |                                    |        |                     | 97.8% (94.47% to 99.40%) |
| Uniform cut-off (Not SNP stratified) | 19.2                               | 182    | 4                   | 97.2% (93.71% to 99.10%) |

**Table S3: Reclassification table of uniform vs. genotype-stratified diagnostic cut-offs**

| CA19-9<br>uniform cut-off | SNP stratified cut-off |          | Total |
|---------------------------|------------------------|----------|-------|
|                           | negative               | positive |       |
| Cases                     |                        |          |       |
| negative                  | 92                     | 24       | 116   |
| positive                  | 4                      | 125      | 129   |
| Total                     | 96                     | 149      | 245   |
| Controls*                 |                        |          |       |
| negative                  | 254                    | 1        | 255   |
| positive                  | 2                      | 2        | 4     |
| Total                     | 256                    | 3        | 259   |

  

| CA125<br>uniform cut-off | SNP stratified cut-off |          | Total |
|--------------------------|------------------------|----------|-------|
|                          | negative               | positive |       |
| Cases                    |                        |          |       |
| negative                 | 191                    | 10       | 201   |
| positive                 | 5                      | 32       | 37    |
| Total                    | 196                    | 42       | 238   |
| Controls*                |                        |          |       |
| negative                 | 176                    | 2        | 178   |
| positive                 | 3                      | 1        | 4     |
| Total                    | 179                    | 3        | 182   |

  

| CEA<br>uniform cut-off | SNP stratified cut-off |          | Total |
|------------------------|------------------------|----------|-------|
|                        | negative               | positive |       |
| Cases                  |                        |          |       |
| negative               | 202                    | 9        | 211   |
| positive               | 4                      | 30       | 34    |
| Total                  | 206                    | 39       | 245   |
| Controls*              |                        |          |       |
| negative               | 254                    | 2        | 256   |
| positive               | 0                      | 3        | 3     |
| Total                  | 254                    | 5        | 259   |

\* Validation set controls

**Table S4. Diagnostic accuracy of SNP-stratified tumor marker combinations**

|                                    | All PDAC cases<br>n=245 | PDAC Intact FUT3<br>n=217 | Stage1 PDAC<br>n=49   | Stage1 PDAC<br>(Intact FUT3)<br>n=45 | Validation set controls<br>n=259 | Validation set controls<br>(Intact FUT3)<br>n=237 |
|------------------------------------|-------------------------|---------------------------|-----------------------|--------------------------------------|----------------------------------|---------------------------------------------------|
|                                    | sensitivity^ (95% CI)   | sensitivity^ (95% CI)     | sensitivity^ (95% CI) | sensitivity^ (95% CI)                | specificity^ (95% CI)            | specificity^ (95% CI)                             |
| CA19-9                             | 60.8% (54.4%, 67%)      | 66.4% (59.6%, 72.6%)      | 36.7% (23.4%, 51.7%)  | 40% (25.7%, 55.7%)                   | 98.8% (96.7%, 99.8%)             | 99.2% (97%, 99.9%)                                |
| CA19-9+CEA                         | 64.5% (58.1%, 70.5%)    | 69.1% (62.5%, 75.2%)      | 40.8% (27%, 55.8%)    | 44.4% (29.6%, 60%)                   | 96.9% (94%, 98.6%)               | 97% (94%, 98.8%)                                  |
| CA19-9+CA125                       | 64.1% (57.7%, 70.1%)    | 68.2% (61.6%, 74.3%)      | 40.8% (27%, 55.8%)    | 42.2% (27.7%, 57.8%)                 | 97.3% (94.5%, 98.9%)             | 97.5% (94.6%, 99.1%)                              |
| CA19-9+Thrombospondin-2*           | 63.7% (57.3%, 69.7%)    | 69.1% (62.5%, 75.2%)      | 36.7% (23.4%, 51.7%)  | 40% (25.7%, 55.7%)                   | 96.1% (93%, 98.1%)               | 96.2% (92.9%, 98.2%)                              |
| CA19-9+CEA+CA125                   | 66.1% (59.8%, 72.0%)    | 70.5% (64%, 76.5%)        | 42.9% (28.8%, 57.8%)  | 42.2% (27.7%, 57.8%)                 | 95.4% (92.1%, 97.6%)             | 95.4% (91.9%, 97.7%)                              |
| CA19-9+CEA+CA125+Thrombospondin-2* | 68.2% (61.9%, 73.9%)    | 72.4% (65.9%, 78.2%)      | 42.9% (28.8%, 57.8%)  | 42.2% (27.7%, 57.8%)                 | 93.1% (89.2%, 95.8%)             | 92.8% (88.8%, 95.8%)                              |

\* THBS2 (thrombospondin-2) was not measured in most Stage I cases

Stage I by AJCC 8th edition; CI, confidence intervals

^Genotype defined cut-offs
